# Supplementary material for: Gross Total Resection Promotes Subsequent Recovery and Further Enhancement of Impaired Natural Killer Cell Activity in Glioblastoma Patients
Source: MDPI journal article supplement (doi:10.3390/brainsci12091144), 2022-08-27
Supplement: s1 [file s1]

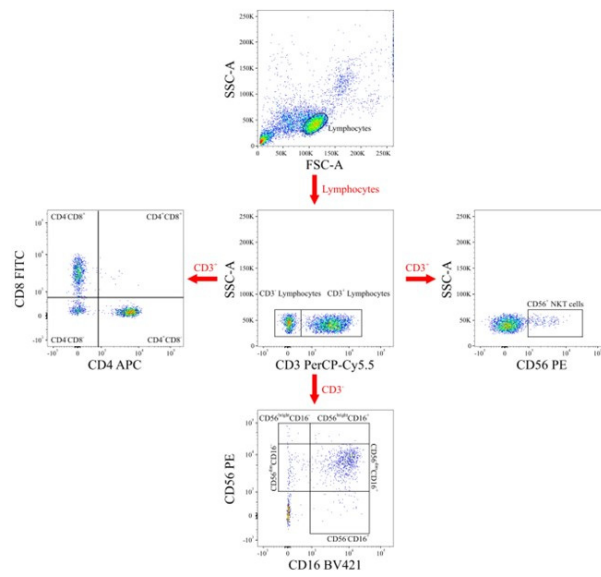

Figure S1. Gating strategy for identification of NK cell and T cell subsets.

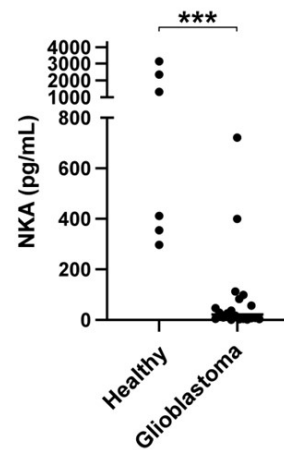

Figure S2. NKA was significantly downregulated in glioblastoma patients

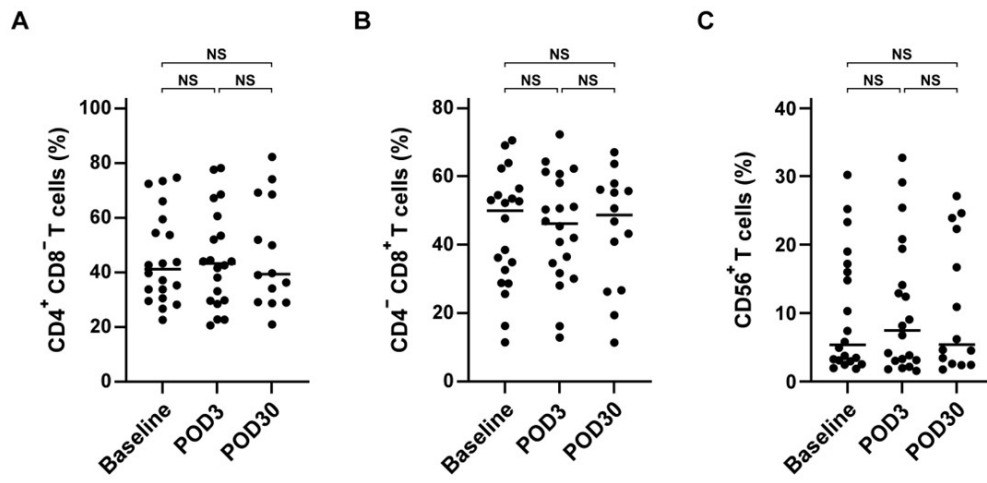

Figure S3. T cell subsets were not redistributed before after cranial surgery.
